# Supplementary material for: Defect-type AlOxnanointerface boosting layered Mn-based oxide cathode for wide-temperature sodium-ion battery
Source: Royal Society of Chemistry journal article supplement (doi:10.1039/d2ta06951b), 2022-01-01
Supplement: d2ta06951b1.pdf [file d2ta06951b1.pdf]

## Supporting Information

### Defect-typed $\text{AlO}_x$ nanointerface boosting layered Mn-based oxide cathode for wide-temperature sodium-ion battery

Zelin Ma <sup>a</sup>, Hanxue Xu <sup>a</sup>, Yunxuan Liu <sup>a</sup>, Qian Zhang <sup>a</sup>, Mengtong Wang <sup>a</sup>, Yuchen Lin <sup>a</sup>, Zhuo Li <sup>a</sup>, Xuexia He <sup>a</sup>, Jie Sun <sup>a</sup>, Ruibin Jiang <sup>a</sup>, Zhibin Lei <sup>a</sup>, Qi Li <sup>a,\*</sup>, Longhai Yang <sup>b,\*</sup> and Zong-huai Liu <sup>a</sup>

- a. Key Laboratory of Applied Surface and Colloid Chemistry, Shaanxi Normal University, Ministry of Education, Xi'an, 710062, P. R. China; School of Materials Science and Engineering, Shaanxi Normal University, Xi'an, 710119, P. R. China.
- b. School of Electrical and Control Engineering, Xi'an University of Science and Technology, Xi'an 710054, Shaanxi, P.R. China.

\* Corresponding author.

E-mail: [clliqi@snnu.edu.cn](mailto:clliqi@snnu.edu.cn) and [ylonghai@hotmail.com](mailto:ylonghai@hotmail.com).

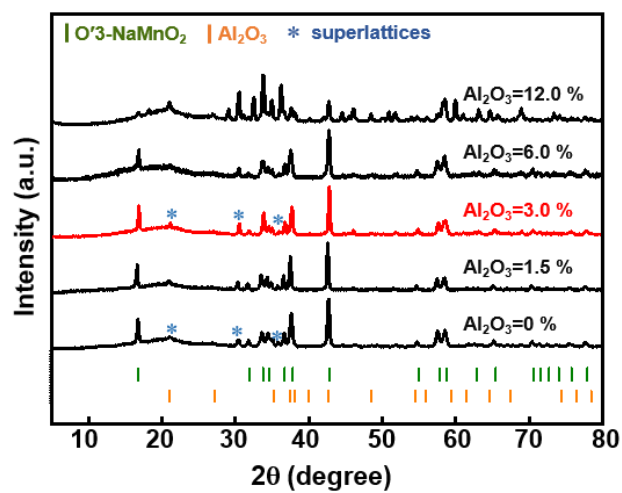

**Figure S1.** XRD patterns of NMA@AlO<sub>x</sub> samples prepared on basis of the different additional Al<sub>2</sub>O<sub>3</sub> contents.

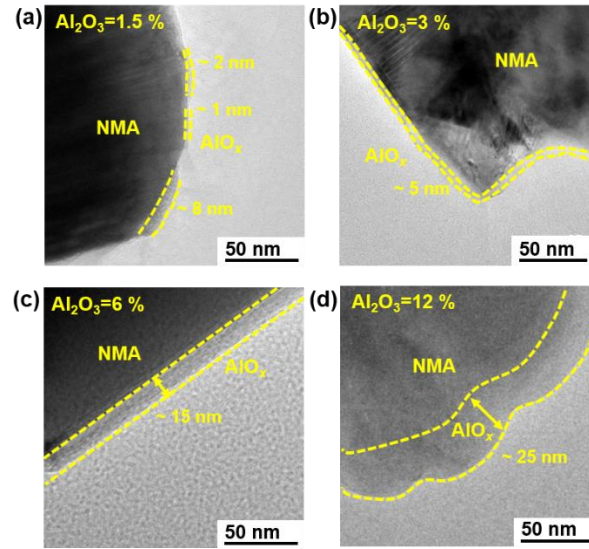

**Figure S2.** TEM images of NMA@AlO<sub>x</sub> samples prepared on basis of the different additional Al<sub>2</sub>O<sub>3</sub> contents.

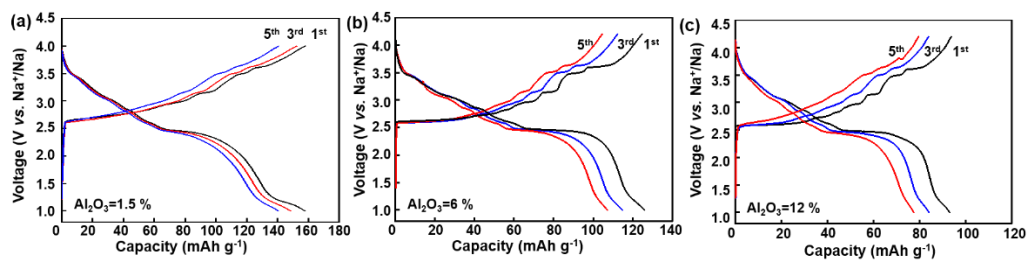

**Figure S3.** Charge and discharge curves of Na/NMA@AlO<sub>x</sub> cells based on the utilization of the different additional Al<sub>2</sub>O<sub>3</sub> contents.

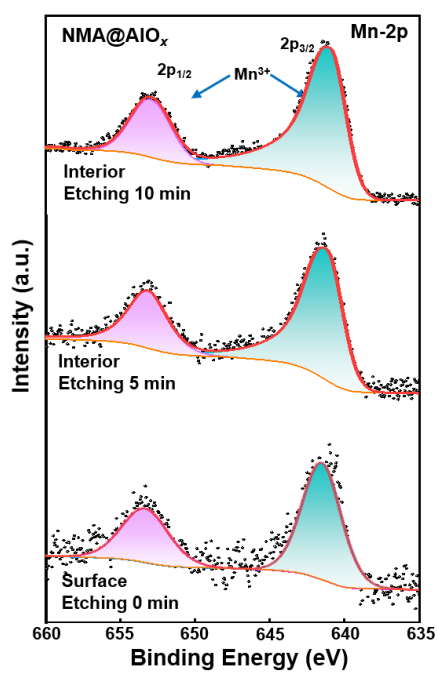

**Figure S4.** XPS spectra of Mn-2p peaks of NMA@ AlO<sub>x</sub> with different etching time.

Pristine, etching 5 min and etching 10 min (from down to top).

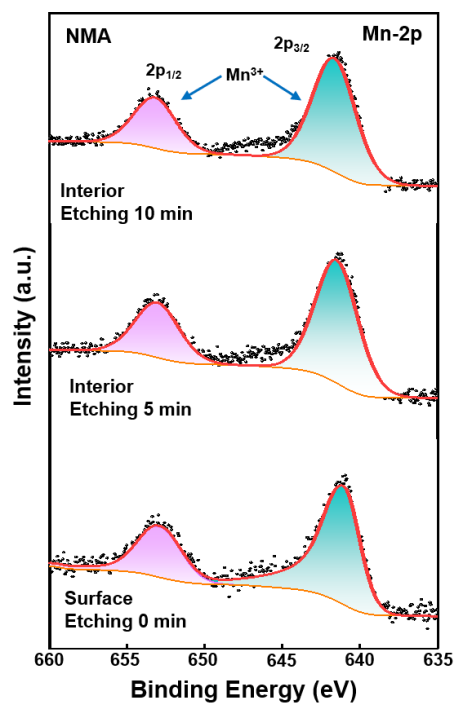

**Figure S5.** XPS spectra of Mn-2p peaks of NMA with different etching time. Pristine, etching 5 min and etching 10 min (from down to top).

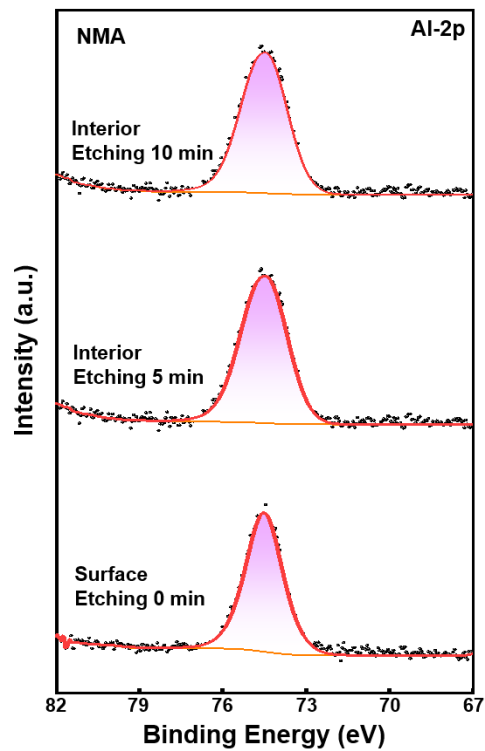

**Figure S6.** XPS spectra of Al-2p peaks of NMA with different etching time. Pristine, etching 5 min and etching 10 min (from down to top).

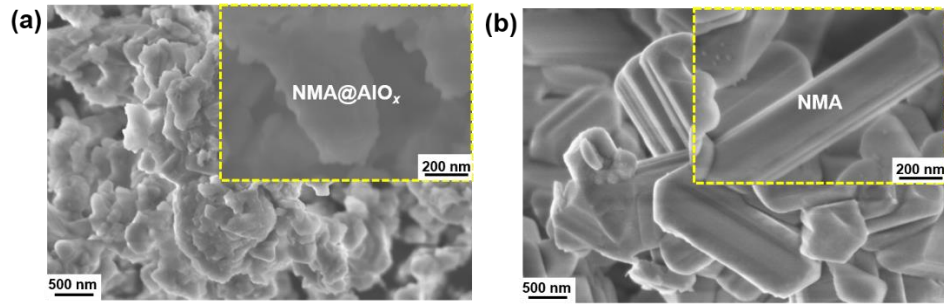

**Figure S7.** SEM images of NMA@AlO<sub>x</sub> (a) and NMA (b).



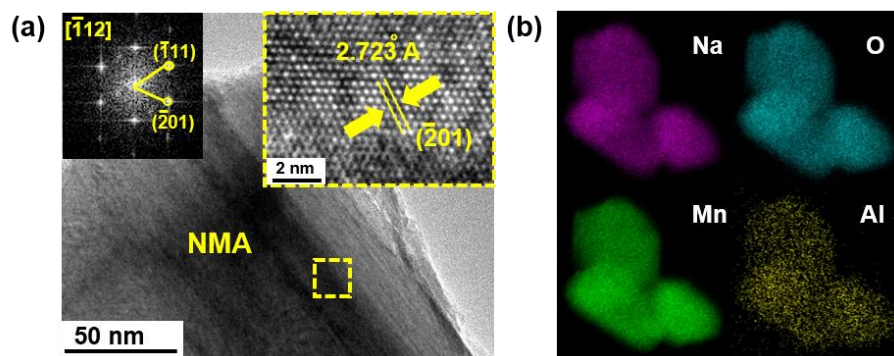

**Figure S8.** HRTEM image (insert, FFT image and corresponding Bragg spots) (a) and TEM-EDS mappings (b) images of NMA.

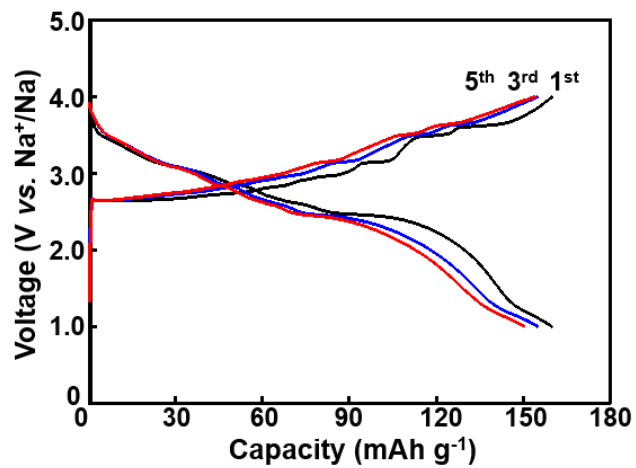

**Figure S9.** Charge-discharge curves of NMA at 20 mA g<sup>-1</sup>.

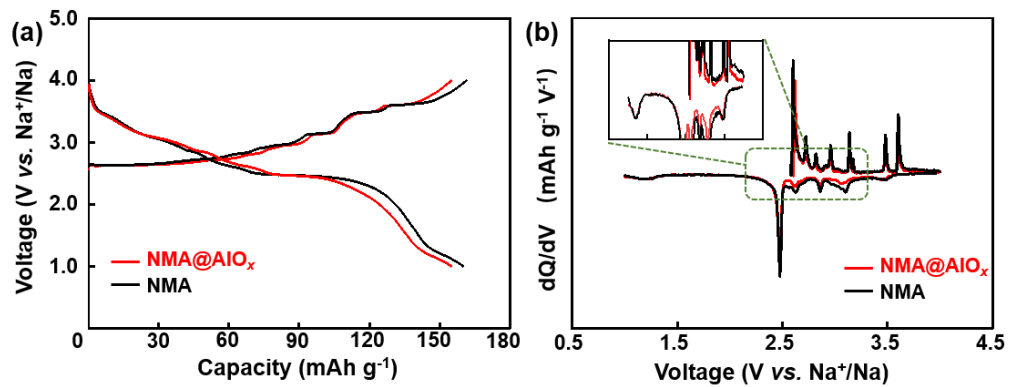

**Figure S10.** First Charge-discharge curves of NMA@AlO<sub>x</sub> and NMA at 20 mA g<sup>-1</sup>

(a) and dQ/dV versus voltage of NMA@AlO<sub>x</sub> and NMA cathodes at 20 mA g<sup>-1</sup> (inset, partial enlarge curves) (b).

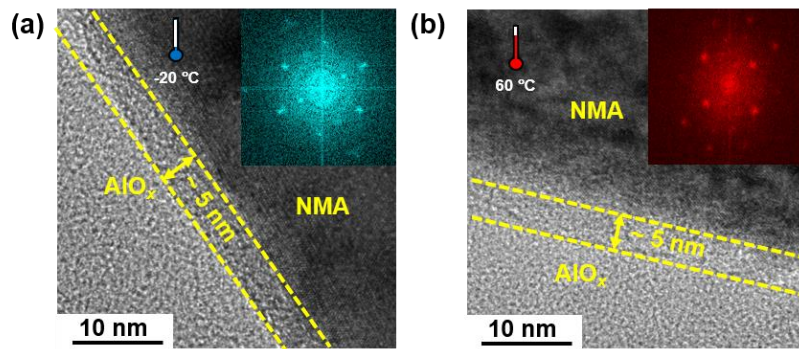

**Figure S11.** TEM images of NMA@AlO<sub>x</sub> after cycled at -20 °C (a) and 60 °C (b)

(insert, SAED patterns).

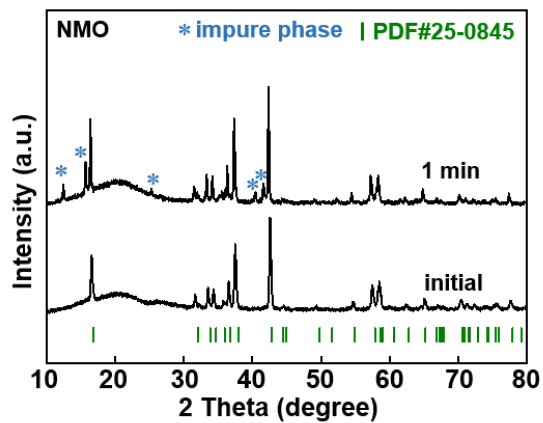

**Figure S12.** XRD patterns of initial NMO and NMO exposed at air for 1 min.

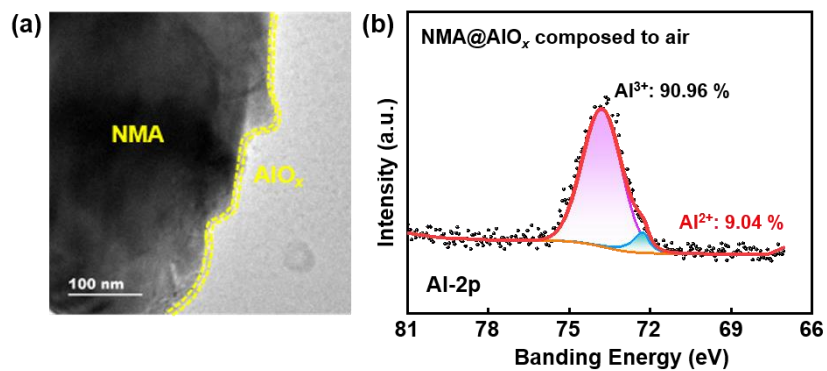

**Figure S13.** TEM image (a) and XPS spectrum of the exposed NMA@AlO<sub>x</sub> sample.

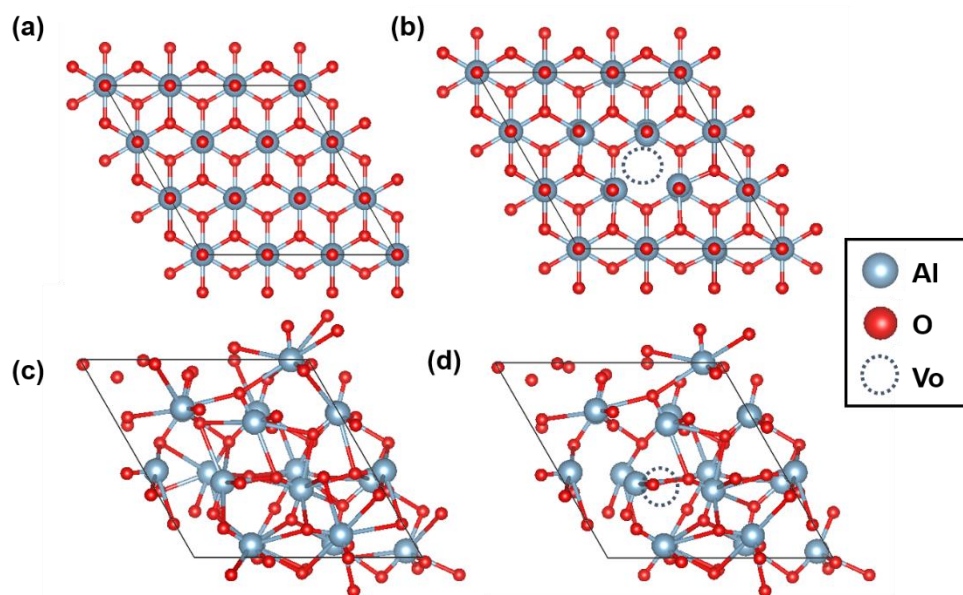

**Figure S14.** Modeling crystal structure diagram of crystalline  $\text{Al}_2\text{O}_3$  (c- $\text{Al}_2\text{O}_3$ ) (a), crystalline  $\text{AlO}_{1.45}$  (c- $\text{AlO}_{1.45}$ ) (b), amorphous  $\text{Al}_2\text{O}_3$  (a- $\text{Al}_2\text{O}_3$ ) (c) and amorphous  $\text{AlO}_{1.45}$  (a- $\text{AlO}_{1.45}$ ) (d).

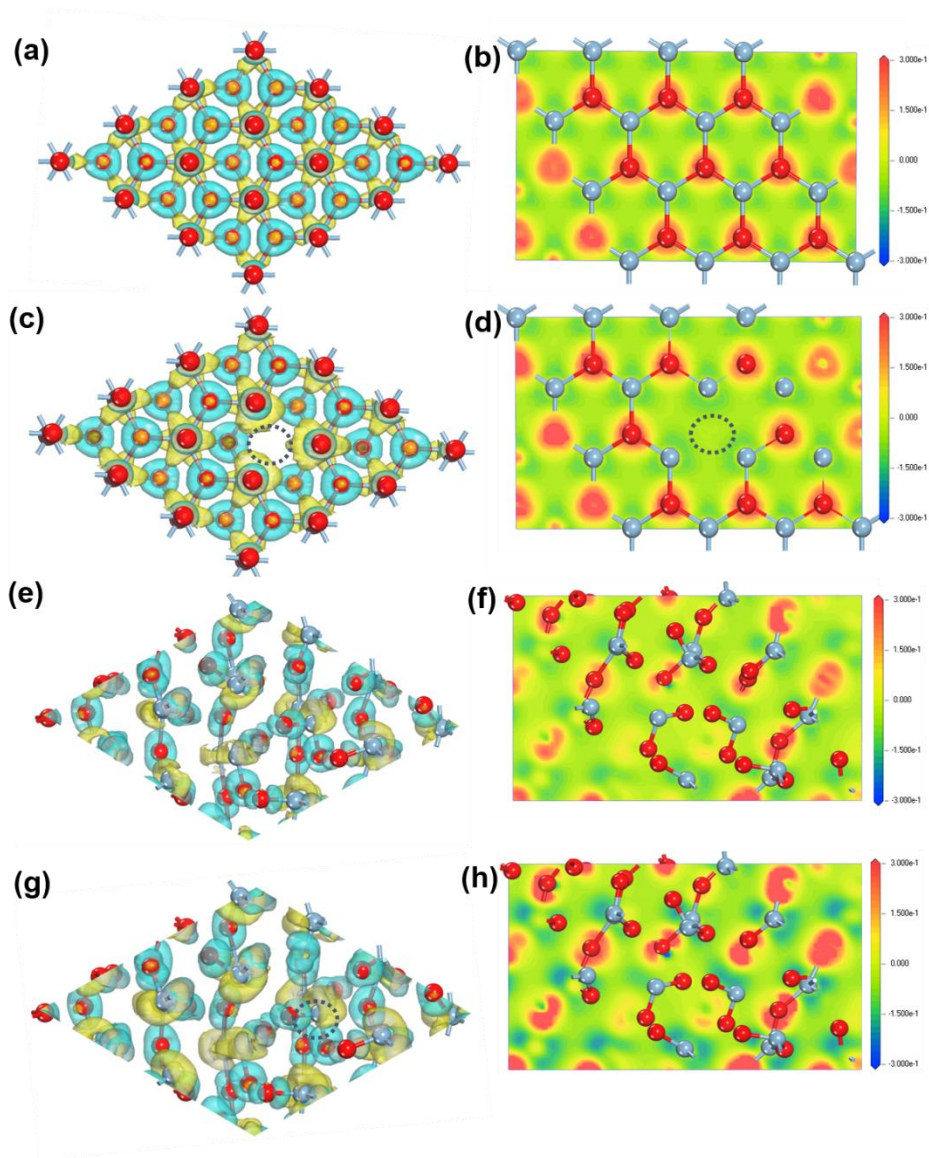

**Figure S15.** Charge density distribution images of crystalline  $\text{Al}_2\text{O}_3$  (a, b), crystalline  $\text{AlO}_{1.45}$  (c, d), amorphous  $\text{Al}_2\text{O}_3$  (e, f) and amorphous  $\text{AlO}_{1.45}$  (g, h).



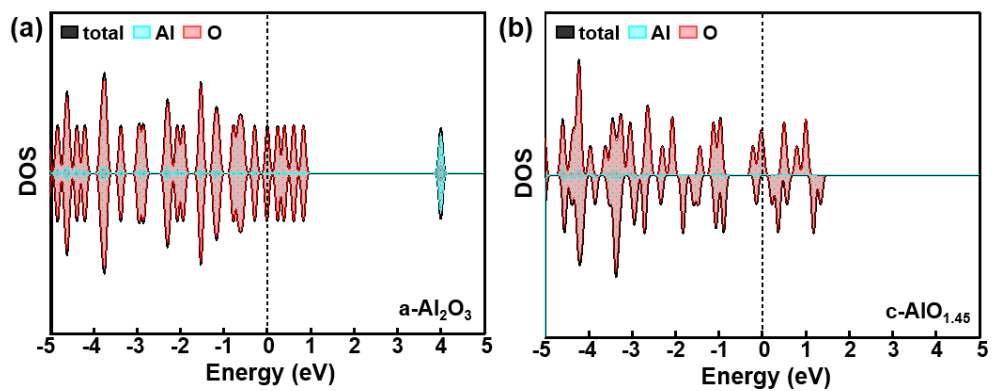

**Figure S16.** DOS curves of amorphous  $\text{Al}_2\text{O}_3$  (a) and crystalline  $\text{AlO}_{1.45}$ .

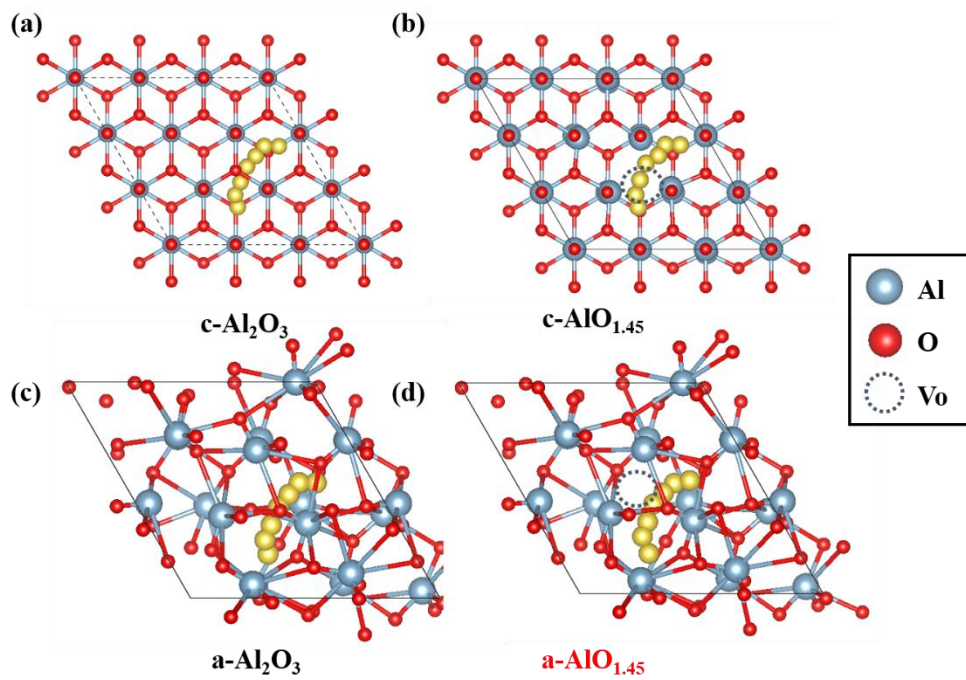

**Figure S17.** Modeling diagram of  $\text{Na}^+$  diffusion. crystalline  $\text{Al}_2\text{O}_3$  ( $\text{c-Al}_2\text{O}_3$ ) (a), crystalline  $\text{AlO}_{1.45}$  ( $\text{c-AlO}_{1.45}$ ) (b), amorphous  $\text{Al}_2\text{O}_3$  ( $\text{a-Al}_2\text{O}_3$ ) (c) and amorphous  $\text{AlO}_{1.45}$  ( $\text{a-AlO}_{1.45}$ ) (d).

**Table S1.** EIS Fitting results of NMA and NMA@AlO<sub>x</sub> at different temperatures

| T (°C) | NMA                |                     |                                                     | NMA@AlO <sub>x</sub> |                     |                                                     |
|--------|--------------------|---------------------|-----------------------------------------------------|----------------------|---------------------|-----------------------------------------------------|
|        | R <sub>s</sub> (Ω) | R <sub>ct</sub> (Ω) | D <sub>Na+</sub> (cm <sup>2</sup> s <sup>-1</sup> ) | R <sub>s</sub> (Ω)   | R <sub>ct</sub> (Ω) | D <sub>Na+</sub> (cm <sup>2</sup> s <sup>-1</sup> ) |
| -20    | 3.575              | 2148                | 1.521×10 <sup>-15</sup>                             | 2.557                | 324.6               | 1.954×10 <sup>-14</sup>                             |
| 25     | 2.379              | 685.5               | 2.031×10 <sup>-13</sup>                             | 2.258                | 272                 | 2.207×10 <sup>-13</sup>                             |
| 60     | 1.822              | 279.3               | 1.386×10 <sup>-13</sup>                             | 1.441                | 141.3               | 1.271×10 <sup>-12</sup>                             |

**Table S2.** Tap-Density data of NMA and NMA@AlO<sub>x</sub>

| Item                              | NMA     | NMA@AlO <sub>x</sub> |
|-----------------------------------|---------|----------------------|
| RPM                               | 250 rpm | 250 rpm              |
| Tap-Density (g cm <sup>-3</sup> ) | 1.16    | 1.22                 |
| Hausner Ratio                     | 1.11    | 1.40                 |
| Compression index                 | 10.00 % | 28.57 %              |

**Table S3.** ICP results of Mn element on Na anode surface of different cells

| cells                                                      | Mn contents (ppm) |
|------------------------------------------------------------|-------------------|
| Na/NMA half cell                                           | 0.00              |
| 250 <sup>th</sup> cycled Na/NMA half cell                  | ~0.75             |
| Na/NMA@AlO <sub>x</sub> half cell                          | 0.00              |
| 250 <sup>th</sup> cycled Na/NMA@AlO <sub>x</sub> half cell | 0.00              |

**Table S4** Comparison of this work and other related work in literatures

| Chemical formula                                                          | Coating layer                           | Specific capacity       | Practical/Theoretical | Rate                                                                                                  | Cycle                         | T (°C) | Literature       |
|---------------------------------------------------------------------------|-----------------------------------------|-------------------------|-----------------------|-------------------------------------------------------------------------------------------------------|-------------------------------|--------|------------------|
| P2-Na <sub>2/3</sub> [Ni <sub>1/3</sub> Mn <sub>2/3</sub> ]O <sub>2</sub> | Al <sub>2</sub> O <sub>3</sub><br>12 nm | 164 mAh g <sup>-1</sup> | 86.3                  | 160 mAh g <sup>-1</sup> ~60 mAh g <sup>-1</sup><br>(C/20~10 C)                                        | 200 cycles, 79.2 %<br>(10 C)  | 25     | [1]              |
| P2-Na <sub>0.5</sub> Mn <sub>0.5</sub> Co <sub>0.5</sub> O <sub>2</sub>   | Al <sub>2</sub> O <sub>3</sub><br>3 nm  | 154 mAh g <sup>-1</sup> | 67.7%                 | 174 mAh g <sup>-1</sup> ~45 mAh g <sup>-1</sup><br>(1/30 C~1/10 C)                                    | 100 cycles, 80 %<br>(10/C)    | 25     | [2]              |
| P2-Na <sub>0.67</sub> MnO <sub>2</sub>                                    | Al <sub>2</sub> O <sub>3</sub><br>3 nm  | 134 mAh g <sup>-1</sup> | 78.3 %                | 156 mAh g <sup>-1</sup> ~103 mAh g <sup>-1</sup><br>(1/30 C~1/10 C)                                   | 200 cycles, 74.1 %<br>(0.1 C) | 25     | [3]              |
| P2Na <sub>2/3</sub> [Ni <sub>1/3</sub> Mn <sub>2/3</sub> ]O <sub>2</sub>  | CuO<br>5 nm                             | 107 mAh g <sup>-1</sup> | 56.3 %                | 107 mAh g <sup>-1</sup> ~70 mAh g <sup>-1</sup><br>(1/30 C~1/10 C)                                    | 20 cycles, 48.6%<br>(0.1 C)   | 25     | [4]              |
| P2-Na <sub>0.5</sub> Ni <sub>0.33</sub> Mn <sub>0.67</sub> O <sub>2</sub> | MgO<br>1.3 nm                           | 131 mAh g <sup>-1</sup> | 68.9%                 | 131 mAh g <sup>-1</sup> ~51 mAh g <sup>-1</sup><br>(1/30 C~1/10 C)                                    | 100 cycles, 83 %              | 25     | [5]              |
| Na[Ni <sub>0.5</sub> Mn <sub>0.5</sub> ]O <sub>2</sub>                    | MgO<br>100 nm                           | 167 mAh g <sup>-1</sup> | 87.9%                 | 167 mAh g <sup>-1</sup> ~100 mAh g <sup>-1</sup><br>(1/30 C~1/10 C)                                   | 200 cycles, 70 %<br>(0.1 C)   | 25     | [6]              |
| Na <sub>0.67</sub> [Ni <sub>0.5</sub> Fe <sub>0.5</sub> ]O <sub>2</sub>   | MgO<br>10 nm                            | 187 mAh g <sup>-1</sup> | 72.8%                 | 187 mAh g <sup>-1</sup> ~87 mAh g <sup>-1</sup><br>(12 mA g <sup>-1</sup> ~480 mA g <sup>-1</sup> )   | 100cycles, 72 %<br>(0.05 C)   | 25     | [7]              |
| NaMn <sub>0.6</sub> Al <sub>0.4</sub> O <sub>2</sub>                      | AlO <sub>x</sub><br>5nm                 | 155 mAh g <sup>-1</sup> | 98.1%                 | 155 mAh g <sup>-1</sup> ~104 mAh g <sup>-1</sup><br>(20 mA g <sup>-1</sup> ~1000 mA g <sup>-1</sup> ) | 250 cycles, 81 %              | -20~60 | <i>This work</i> |

## References

- [1] Y. Liu, X. Fang, A. Zhang, C. Shen, Q. Liu, H. A. Enaya, C. Zhou, Layered P2-Na<sub>2/3</sub>[Ni<sub>1/3</sub>Mn<sub>2/3</sub>]O<sub>2</sub> as high-voltage cathode for sodium-ion batteries: The capacity decay mechanism and Al<sub>2</sub>O<sub>3</sub> surface modification, *Nano Energy* 27 (2016) 27-34.
- [2] H. V. Ramasamy, P. N. Didwal, S. Sinha, V. Aravindan, J. Heo, C.-J. Park, Y.-S. Lee, Atomic layer deposition of Al<sub>2</sub>O<sub>3</sub> on P2-Na<sub>0.5</sub>Mn<sub>0.5</sub>Co<sub>0.5</sub>O<sub>2</sub> as interfacial layer for high power sodium-ion batteries, *J. Colloid Interface Sci.* 564 (2020) 467-477.
- [3] W. Zuo, J. Qiu, X. Liu, B. Zheng, Y. Zhao, J. Li, H. He, K. Zhou, Z. Xiao, Q. Li, G. F. Ortiz, Y. Yang, Highly-stable P2-Na<sub>0.67</sub>MnO<sub>2</sub> electrode enabled by lattice tailoring and surface engineering, *Energy Stor. Mater.* 26 (2020) 503-512.
- [4] R. Dang, Q. Li, M. Chen, Z. Hu, X. Xiao, CuO-coated and Cu<sup>2+</sup>-doped Co-modified P2-type Na<sub>2/3</sub>[Ni<sub>1/3</sub>Mn<sub>2/3</sub>]O<sub>2</sub> for sodium-ion batteries, *Phys. Chem. Chem. Phys.* 21 (2019) 314-321.
- [5] H. V. Ramasamy, K. Kaliyappan, R. Thangavel, V. Aravindan, K. Kang, D. U. Kim, Y. Park, X. Sun, Y.-S. Lee, Cu-doped P2-Na<sub>0.5</sub>Ni<sub>0.33</sub>Mn<sub>0.67</sub>O<sub>2</sub> encapsulated with MgO as a novel high voltage cathode with enhanced Na-storage properties, *J. Mater. Chem. A* 5 (2017) 8408-8415.

- [6] J.-Y. Hwang, T.-Y. Yu, Y.-K. Sun, Simultaneous MgO coating and Mg doping of Na[Ni<sub>0.5</sub>Mn<sub>0.5</sub>]O<sub>2</sub> cathode: facile and customizable approach to high-voltage sodium-ion batteries, *J. Mater. Chem. A* 6 (2018) 16854-16862.
- [7] W. Kong, H. Wang, L. Sun, C. Su, X. Liu, Understanding the synergic roles of MgO coating on the cycling and rate performance of Na<sub>0.67</sub>Mn<sub>0.5</sub>Fe<sub>0.5</sub>O<sub>2</sub> cathode, *Appl. Surf. Sci.* 497 (2019) 143841.
